# Supplementary material for: Unveiling the Micronome of Cassava (Manihot esculenta Crantz)
Source: PLoS One. 2016 Jan 22;11(1):e0147251. doi: 10.1371/journal.pone.0147251 (PMC4723133; doi:10.1371/journal.pone.0147251)
Supplement: S3 Table — (XLSX) [file pone.0147251.s003.xlsx]

## Sheet: Sheet1
S3 Table Characterisation of the identified conserved miRNAs for cassava (Manihot esculenta) usingDeep-sequencing data
miRNA	Actual sequence	Scaffold	Reference miRNA Sequence	Resource	pre-mirna length	miRNA length	Mismatches	Bulges	Loc	Strand	A/U%	G/C%	MFE (-ΔG)	AMFE	MFEI	Match type	Number of nts	Mismatches
MIR535b	UUGACGACGAGAGAGAGCACG	Scaffold 01190	UGACGACGAGAGAGAGCACGC	Prunus persica	105	21	4		3'	Antisense	53.34	46.66	41.2	39.2381	0.840936	5' super/ 3' sub templated	2	0
MIR535b	UUGACGACGAGAGGGAGCACG	Scaffold 01190	UGACGACGAGAGAGAGCACGC	Prunus persica	105	21	4		3'	Antisense	53.34	46.66	41.2	39.2381	0.840936	5' super/ 3' sub polymorphic	3	1
MIR535d	UGACGACGAGAGAGAGCACG	Scaffold 01190	UGACGACGAGAGAGAGCACGC	Malus domestica	98	20	3		3'	Antisense	53.07	46.93	38.7	39.4898	0.841462	3' sub templated	1	0
MIR169r	GAGCCAAGAAUGACUUGCCGGC	Scaffold 12768	GAGCCAAGAAUGACUUGCCGG	Cucumis melo	133	22		2 (1 nt each)	3'	Antisense	59.4	40.6	45.5	34.2105	0.842624	3' super templated	1	0
MIR319c//MIR319e	UCUUGGACUGAAGGGAGCUCCC	Scaffold 03264	CUUGGACUGAAGGGAGCUCCC	Physcomitrella patens	188	22	2		5'	Antisense	51.6	48.4	76.7	40.7979	0.842931	5' super templated	1	0
MIR166	GUCGGACCAGGCUUCAUUCCC	Scaffold 03846	UCGGACCAGGCUUCAUUCCCCC	Citrus trifoliata	156	21	5		3'	Sense	57.7	42.3	56	35.8974	0.848639	5' super/ 3' sub templated	3	0
MIR171	UUGAGCCGCGUCAAUAUCUC	Scaffold 05214	UUGAGCCGCGUCAAUAUCUCC	Citrus trifoliata	87	20		1 (2 nts)	5'	Antisense	60.92	39.08	28.9	33.2184	0.85001	3' sub templated	1	0
MIR171	UUGAGCCGCGUCAAUAUCUCC	Scaffold 05214	UUGAGCCGCGUCAAUAUCUCC	Citrus trifoliata	87	21		1 (2 nts)	5'	Antisense	60.92	39.08	28.9	33.2184	0.85001	Exact Match	0	0
MIR171	UUGAGCCGCGUCAAUAUCU	Scaffold 05214	UUGAGCCGCGUCAAUAUCUCC	Citrus trifoliata	87	19		1 (2 nt)	5'	Antisense	60.92	39.08	28.9	33.2184	0.85001	3' sub templated	1	0
MIR398	UGUGUUCUCAGGUCGCCCCUG	Scaffold 07991	UGUGUUCUCAGGUCGCCCCUG	Cynara cardunculus	233	21	2		3'	Sense	55.8	44.2	87.6	37.5966	0.850601	Exact Match	0	0
MIR167d	UGAAGCUGCCAGCAUGAUCUGA	Scaffold 03614	UGAAGCUGCCAGCAUGAUCUGA	Carica papaya	126	22	3	1 (1nt)	3'	Antisense	57.15	42.85	46.2	36.6667	0.855698	Exact Match	0	0
MIR159b	CUUGCAUAUCUCAGGAGCUU	Scaffold 03525	UUGCAUAUCUCAGGAGCUUCA	Hevea brasiliensis	95	20	6	1 (1 nt)	5'	Sense	54.74	45.26	36.8	38.7368	0.855874	5' super/ 3' sub templated	3	0
MIR167j	AUGAAGCUGCCAGCAUGAUCUG	Scaffold 03614	UGAAGCUGCCAGCAUGAUCUG	Zea mays	111	22	2	1 (1 nt)	3'	Antisense	56.79	43.21	41.4	37.2973	0.863164	5' sub templated	1	0
MIR171	UUGAGCCGCGUCAAUAUCUCCUU	Scaffold 05214	UUGAGCCGCGUCAAUAUCUCC	Citrus trifoliata	130	23	2	1 (2 nts)	5'	Antisense	60	40	45	34.6154	0.865385	3' super templated	2	0
MIR319a	AGAGCUUCCUUCAGUCCACU	Scaffold 06557	AGAGCUUCCUUCAGUCCACUC	Medicago truncatula	206	20	3		5'	Sense	59.23	40.77	72.8	35.3398	0.866809	3' sub templated	1	0
MIR319a	AGAGCUUCCUUCAGUCCACUCA	Scaffold 06557	AGAGCUUCCUUCAGUCCACUC	Medicago truncatula	206	22	3		5'	Sense	59.23	40.77	72.8	35.3398	0.866809	3' super templated	1	0
MIR319a	GAGCUUCCUUCAGUCCACUC	Scaffold 06557	AGAGCUUCCUUCAGUCCACUC	Medicago truncatula	206	20	2		5'	Sense	59.23	40.77	72.8	35.3398	0.866809	5' sub templated	1	0
MIR319a	GAGCUUCCUUCAGUCCACUCA	Scaffold 06557	AGAGCUUCCUUCAGUCCACUC	Medicago truncatula	206	21	2		5'	Sense	59.23	40.77	72.8	35.3398	0.866809	5' sub/ 3' super templated	2	0
MIR166a	GAAUGUUGUCUGGCUCGAGGAC	Scaffold 03846	GGAAUGUUGUCUGGCUCGAGG	Arabidopsis lyrata	180	22	5		5'	Sense	58.34	41.66	65.1	36.1667	0.868139	5' sub/3' super templated	3	0
MIR171f	UGAUUGAGCCGUGCCAAUAUCU	Scaffold 06512	UGAUUGAGCCGUGCCAAUAUC	Cucumis melo	130	22	3		3'	Sense	56.16	43.84	49.5	38.0769	0.868543	3' super templated	1	0
MIR169i//MIR169j	AGAGCCAAGAAUGACUUGCCGGC	Scaffold 12768	GAGCCAAGAAUGACUUGCCGG	Manihot esculenta	87	23	1	2 (1 nt each)	3'	Antisense	55.18	44.82	34.2	39.3103	0.877072	5' and 3' super templated	2	0
MIR535	UGACAACGAGAGAGAGCACG	Scaffold 05782	UGACAACGAGAGAGAGCACGC	Picea abies	120	20	1		3'	Antisense	55.84	44.16	46.5	38.75	0.877491	3' sub templated	1	0
MIR535a	UGACAACGAGAGAGAGCACGU	Scaffold 05782	UGACAACGAGAGAGAGCACGU	Manihot esculenta	120	21	2		3'	Antisense	55.84	44.16	46.5	38.75	0.877491	Exact Match	0	0
MIR535a	GACAACGAGAGAGAGCACGU	Scaffold 05782	UGACAACGAGAGAGAGCACGU	Manihot esculenta	120	20	2		3'	Antisense	55.84	44.16	46.5	38.75	0.877491	5' sub templated	1	0
MIR535a	UGACAACGAGAGAGAGCACGUU	Scaffold 05782	UGACAACGAGAGAGAGCACGU	Manihot esculenta	120	22	2		3'	Antisense	55.84	44.16	46.5	38.75	0.877491	3' super templated	1	0
MIR535a	UUGACAACGAGAGAGAGCACGU	Scaffold 05782	UGACAACGAGAGAGAGCACGU	Manihot esculenta	120	22	3		3'	Antisense	55.84	44.16	46.5	38.75	0.877491	5' super templated	1	0
MIR171b//MIR171c	UUGAGCCGUGCCAAUAUCACG	Scaffold 02717	UUGAGCCGUGCCAAUAUCACG	Arabidopsis lyrata	122	21	4		5'	Antisense	63.12	36.88	39.6	32.459	0.880125	Exact Match	0	0
MIR171b	UUGAGCCGUGCCAAUAUCAC	Scaffold 02717	UUGAGCCGUGCCAAUAUCAC	Zea mays	98	20	4		5'	Antisense	58.17	41.83	36.1	36.8367	0.88063	Exact Match	0	0
MIR535	GACAACGAGAGAGAGCACG	Scaffold 05782	UGACAACGAGAGAGAGCACGC	Picea abies	120	19	1		3'	Antisense	56.67	43.33	46.5	38.75	0.8943	5' and 3' sub templated	2	0
MIR166b	UCGGACCAGGCUUCAUUCCCCU	Scaffold 07330	UCGGACCAGGCUUCAUUCCCC	Pinus taeda	120	22	5		5'	Antisense	55	45	48.4	40.3333	0.896296	3' super templated	1	0
MIR166b//MIR166d	GGAAUGUUGUCUGGUUCAAG	Scaffold 07330	GGAAUGUUGUCUGGUUCAAGG	Zea mays	120	20	5		3'	Antisense	55	45	48.4	40.3333	0.896296	3' sub templated	1	0
MIR166f	CCUCGGACCAGGCUUCAUUCCCC	Scaffold 07330	UCGGACCAGGCUUCAUUCCCC	Physcomitrella patens	120	23	5		3'	Antisense	55	45	48.4	40.3333	0.896296	5' super templated	2	0
MIR397	UCAUUGAGUGCAGCGUUGA	Scaffold 09000	UCAUUGAGUGCAGCGUUGACG	Picea abies	112	19	3		3'	Antisense	58.04	41.96	42.3	37.7679	0.900092	3' sub templated	2	0
MIR166r	CCUCGGACCAGGCUUCAUUCCC	Scaffold 07330	UCGGACCAGGCUUCAUUCCC	Glycine max	77	22	5		5'	Antisense	54.55	45.45	31.6	41.039	0.902947	5' super templated	2	0
MIR319	UUGGACUGAAGGGAGCUCCCU	Scaffold 10122	UUGGACUGAAGGGAGCUCCCU	Cynara cardunculus	176	21	4		3'	Sense	51.71	48.29	76.9	43.6932	0.904808	Exact Match	0	0
MIR319	UUGGACUGAAGGGAGCUCC	Scaffold 10122	UUGGACUGAAGGGAGCUCC	Pinus taeda	176	19	4		3'	Sense	51.71	48.29	76.9	43.6932	0.904808	Exact Match	0	0
MIR319a//MIR319b	CUUGGACUGAAGGGAGCUCC	Scaffold 10122	CUUGGACUGAAGGGAGCUCC	Physcomitrella patens	176	20	5		3'	Sense	51.71	48.29	76.9	43.6932	0.904808	Exact Match	0	0
MIR535a//MIR535b	UUGACAACGAGAGAGAGCAC	Scaffold 05782	UGACAACGAGAGAGAGCACGU	Manihot esculenta	113	20	2		3'	Antisense	56.64	43.36	44.4	39.292	0.906182	5' super/3' sub templated	3	0
MIR170//MIR171a	UAUUGGCCUGGUUCACUCAGA	Scaffold 07520	UAUUGGCCUGGUUCACUCAGA	Arabidopsis lyrata	203	21	2		5'	Sense	62.57	37.43	69.1	34.0394	0.909415	Exact Match	0	0
MIR319	UUGGACUGAAGGGAGCUCCCUU	Scaffold 10493	UUGGACUGAAGGGAGCUCCCU	Cynara cardunculus	203	22	4		5'	Antisense	48.28	51.72	95.6	47.0936	0.910549	3' super templated	1	0
MIR162a//MIR162b	UCGAUAAACCUCUGCAUCCAGC	Scaffold 07762	UCGAUAAACCUCUGCAUCCAG	Arabidopsis lyrata	112	22	2		5'	Antisense	50.83	49.17	50.2	44.8214	0.91156	3' super templated	1	0
MIR167d	UGAAGCUGCCAGCAUGAUCUGAA	Scaffold 09347	UGAAGCUGCCAGCAUGAUCUGA	Manihot esculenta	124	23	1	2 (1 nt each)	3'	Antisense	53.23	46.77	52.9	42.6613	0.912151	3' super templated	1	0
MIR167d//MIR167f	UUGAAGCUGCCAGCAUGAUCUG	Scaffold 09347	UGAAGCUGCCAGCAUGAUCUG	Cucumis melo	124	22	2	1 (1 nt)	3'	Antisense	53.23	46.77	52.9	42.6613	0.912151	5' super templated	1	0
MIR162	UCGAUAAACCUCUGCAUCC	Scaffold 07762	UCGAUAAACCUCUGCAUCCAG	Pinus densata	112	19	2		5'	Antisense	50.9	49.1	50.2	44.8214	0.91286	3' sub templated	2	0
MIR162a//MIR162b	GGAGGCAGCGGUUCAUCGAUC	Scaffold 07762	GGAGGCAGCGGUUCAUCGAUC	Arabidopsis lyrata	112	21	2		3'	Antisense	50.9	49.1	50.2	44.8214	0.91286	Exact Match	0	0
MIR6445a//MIR6445b	UUCAUUCCUCUUCCUAAAAUG	Scaffold 08359	UUCAUUCCUCUUCCUAAAAUGG	Populus trichocarpa	112	21	1	1 (1 nt)	5'	Sense	63.4	36.6	37.5	33.4821	0.914813	3' sub templated	1	0
MIR408b	UGCACUGCCUCUUCCCUGGCU	Scaffold 07571	UGCACUGCCUCUUCCCUGGCU	Physcomitrella patens	179	21	5		3'	Sense	50.84	49.16	80.7	45.0838	0.917083	Exact Match	0	0
MIR408d	UGCACUGCCUCUUCCCUGGC	Scaffold 07571	UGCACUGCCUCUUCCCUGGC	Glycine max	179	20	5		3'	Sense	50.84	49.16	80.7	45.0838	0.917083	Exact Match	0	0
MIR319b	AUUGGACUGAAGGGAGCUCCCUU	Scaffold 10493	UUGGACUGAAGGGAGCUCCC	Populus trichocarpa	203	23	4		5'	Antisense	48.77	51.23	95.6	47.0936	0.919258	5' and 3' super templated	3	0
MIR169	CAGCCAAGAAUGACUUGCCU	Scaffold 03614	CAGCCAAGAAUGACUUGCCG	Carica papaya	200	20	2		5'	Sense	61.5	38.5	71.1	35.55	0.923377	polymorphic	1	1
MIR164b//MIR164c//MIR164d	UGGAGAAGCAGGGCACGUGC	Scaffold 08265	UGGAGAAGCAGGGCACGUGC	Glycine max	130	20	2		5'	Sense	47.7	52.3	63.3	48.6923	0.931019	Exact Match	0	0
MIR167c	UGAAGCUGCCAGCAUGAUCUU	Scaffold 01551	UGAAGCUGCCAGCAUGAUCUU	Carica papaya	92	21	2	1 (1 nt)	3'	Antisense	54.3	45.7	39.2	42.6087	0.932357	Exact Match	0	0
MIR167	AGAUCAUGUGGCAGUUUCACC	Scaffold 01551	AGAUCAUGUGGCAGUUUCACC	Arachis hypogaea	92	21	2		5'	Antisense	54.35	45.65	39.2	42.6087	0.933378	Exact Match	0	0
MIR167	GAUCAUGUGGCAGUUUCACC	Scaffold 01551	AGAUCAUGUGGCAGUUUCACC	Arachis hypogaea	92	20	2		5'	Antisense	54.35	45.65	39.2	42.6087	0.933378	5' sub templated	1	0
MIR319a	ACUUGGACUGAAGGGAGCUCCCU	Scaffold 10122	UUGGACUGAAGGGAGCUCCC	Cucumis melo	229	23	5		3'	Sense	60.7	39.3	84.5	36.8996	0.93892	5' and 3' super templated	3	0
MIR319a	CUUGGACUGAAGGGAGCUCCCUU	Scaffold 10122	UUGGACUGAAGGGAGCUCCC	Cucumis melo	229	23	6		3'	Sense	60.7	39.3	84.5	36.8996	0.93892	5' and 3' super templated	3	0
MIR319c//MIR319d	UUGGACUGAAGGGAGCUCCU	Scaffold 06446	UUGGACUGAAGGGAGCUCCU	Cucumis melo	174	20	2		5'	Antisense	50.58	49.42	80.8	46.4368	0.939635	Exact Match	0	0
MIR397	CAUCAACGCUGCACUCAAUGA	Scaffold 09000	CAUCAACGCUACACUCAAUCA	Solanum tuberosum	114	21	3		3'	Sense	58.78	41.22	44.2	38.7719	0.94061	polymorphic	2	2
MIR397a//MIR397b	UCAUUGAGUGCAGCGUUGAUG	Scaffold 09000	UCAUUGAGUGCAGCGUUGAUG	Arabidopsis lyrata	114	21	3		3'	Antisense	58.78	41.22	44.2	38.7719	0.94061	Exact Match	0	0
MIR169	UAGAGCCAAGAAUGACUUGCCG	Scaffold 12448	GAGCCAAGAAUGACUUGCCGA	Citrus sinensis	147	22	1	2 (1 nt each)	3'	Antisense	61.91	38.09	52.7	35.8503	0.941201	5' super/ 3' sub templated	3	0
MIR169i//MIR169j//MIR169k//MIR169n	AGAGCCAAGAAUGACUUGCC	Scaffold 12448	GAGCCAAGAAUGACUUGCCGG	Manihot esculenta	147	20	1	1 (1 nt)	3'	Antisense	61.91	38.09	52.7	35.8503	0.941201	5' super/3' sub templated	3	0
MIR535	UGACAACGAGAGAGAGCAC	Scaffold 01190	UGACAACGAGAGAGAGCACGC	Picea abies	80	19	2		3'	Antisense	52.5	47.5	35.8	44.75	0.942105	3' sub templated	2	0
MIR535b	UGACAACGAGAGAGAGCACGG	Scaffold 01190	UGACAACGAGAGAGAGCACGG	Manihot esculenta	80	21	4		3'	Antisense	52.5	47.5	35.8	44.75	0.942105	Exact Match	0	0
MIR408	AUGCACUGCCUCUUCCCUGGCU	Scaffold 00080	AUGCACUGCCUCUUCCCUGGC	Pinus taeda	133	22	5		5'	Antisense	50.38	49.62	62.2	46.7669	0.942501	3' super templated	1	0
MIR166b	UCGGACCAGGCUUCAUUCCCCUC	Scaffold 07330	UCGGACCAGGCUUCAUUCCCC	Pinus taeda	102	23	5		5'	Antisense	55	45	43.4	42.549	0.945534	3' super templated	2	0
MIR166a//MIR166c//MIR166d	GGAAUGUUGUCUGGCUCGAGG	Scaffold 00977	GGAAUGUUGUCUGGCUCGAGG	Arabidopsis lyrata	139	21	6		3'	Sense	60.44	39.56	52	37.4101	0.945654	Exact Match	0	0
MIR156e	UGACAGAAGAGAGUGAGCACUU	Scaffold 07318	UGACAGAAGAGAGUGAGCAC	Brassica napus	100	22	2		3'	Antisense	54	46	43.6	43.6	0.947826	3' super templated	2	0
MIR482a	AGGAAUGGGCGGUUUGGGAAAA	Scaffold 04043	AGGAAUGGGCUGUUUGGGAAGA	Malus domestica	191	22	3		3'	Antisense	58.12	41.88	76.1	39.8429	0.951359	polymorphic	2	2
MIR408	AUGCACUGCCUCUUCCCUGGC	Scaffold 00080	AUGCACUGCCUCUUCCCUGGC	Pinus taeda	135	21	5		5'	Antisense	49.63	50.37	65.1	48.2222	0.95736	Exact Match	0	0
MIR408	AUGCACUGCCUCUUCCCUG	Scaffold 00080	AUGCACUGCCUCUUCCCUGGC	Pinus taeda	135	19	4		5'	Antisense	49.63	50.37	65.1	48.2222	0.95736	3' sub templated	2	0
MIR408	CAUGCACUGCCUCUUCCCUGGC	Scaffols 00080	AUGCACUGCCUCUUCCCUGGC	Arabidopsis lyrata	135	22	5		5'	Antisense	49.63	50.37	65.1	48.2222	0.95736	5' super templated	1	0
MIR408b	ACUGGGAACAGGCAGAGCAU	Scaffold 00080	ACUGGGAACAGGCAGAGCAUGA	Hevea brasiliensis	135	20	5		3'	Antisense	49.63	50.37	65.1	48.2222	0.95736	3' sub templated	2	0
MIR408b	ACUGGGAACAGGCAGAGCAUG	Scaffold 00080	ACUGGGAACAGGCAGAGCAUGA	Hevea brasiliensis	135	21	5		3'	Antisense	49.63	50.37	65.1	48.2222	0.95736	3' sub templated	1	0
MIR408b	UGCACUGCCUCUUCCCUGGCUU	Scaffold 00080	UGCACUGCCUCUUCCCUGGCU	Physcomitrella patens	135	22	5		5'	Antisense	49.63	50.37	65.1	48.2222	0.95736	3' super templated	1	0
MIR6445a//MIR6445b	UUCAUUCCUCUUCCUAAAAU	Scaffold 08359	UUCAUUCCUCUUCCUAAAAUGG	Populus trichocarpa	114	20	1	1 (1 nt)	5'	Sense	64.04	35.96	39.4	34.5614	0.961107	3' sub templated	2	0
MIR166	CGUCGGACCAGGCUUCAUUCCCC	Scaffold 03846	UCGGACCAGGCUUCAUUCCCCC	Citrus trifoliata	209	23	5		3'	Sense	65.56	34.44	69.2	33.11	0.961384	5' super/ 3' sub templated	3	0
MIR398	GGAGCGACCUGAGAUCACAUG	Scaffold 07991	GGAGCGACCUGAGAUCACAUG	Hevea brasiliensis	154	21	2		5'	Sense	51.95	48.05	71.2	46.2338	0.962201	Exact Match	0	0
MIR535a//MIR535b	UUGACAACGAGAGAGAGCACG	Scaffold 01190	UGACAACGAGAGAGAGCACGU	Manihot esculenta	82	21	3		3'	Antisense	53.66	46.34	36.8	44.878	0.968452	5' super/3' sub templated	2	0
MIR535b	UUGACAACGAGAGAGAGCACGG	Scaffold 01190	UGACAACGAGAGAGAGCACGG	Manihot esculenta	82	22	4		3'	Antisense	53.66	46.34	36.8	44.878	0.968452	5' super templated	1	0
MIR393a//MIR393b	AUCAUGCUAUCCCUUUGGAUU	Scaffold 08265	AUCAUGCUAUCCCUUUGGAUU	Populus trichocarpa	110	21	2		3'	Sense	55.46	44.54	47.5	43.1818	0.969506	Exact Match	0	0
MIR393a//MIR393b//MIR393c	UCCAAAGGGAUCGCAUUGAU	Scaffold 08265	UCCAAAGGGAUCGCAUUGAUCC	Helianthus tuberosus	110	20	1	1 (1 nt)	5'	Sense	55.46	44.54	47.5	43.1818	0.969506	3' sub templated	2	0
MIR398	GGAGCGACCUGAGAUCACAUGUG	Scaffold 07991	GGAGCGACCUGAGAUCACAUG	Hevea brasiliensis	147	23	3		5'	Sense	51.03	48.97	69.8	47.483	0.969634	3' super templated	2	0
MIR171c	AGAUAUUGGUGCGGUUCAAUC	Scaffold 06598	AGAUAUUGGUGCGGUUCAAUC	Arabidopsis lyrata	90	21	4		3'	Antisense	58.89	41.11	35.9	39.8889	0.970296	Exact Match	0	0
MIR396b	CUCAAGAAAGCUGUGGGA	Scaffold 05297	GCUCAAGAAAGCUGUGGGAAA	Arabidopsis lyrata	93	18	2		5'	Antisense	54.84	45.16	40.8	43.871	0.971456	5' and 3' sub templated	3	0
MIR408	AUGCACUGCCUCUUCCCUGG	Scaffold 07571	AUGCACUGCCUCUUCCCUGGC	Pinus taeda	141	20	5		3'	Sense	46.81	53.19	72.9	51.7021	0.972027	3' sub templated	1	0
MIR408	CAUGCACUGCCUCUUCCCUG	Scaffold 07571	AUGCACUGCCUCUUCCCUGGC	Arabidopsis lyrata	141	20	4		3'	Sense	46.81	53.19	72.9	51.7021	0.972027	5' super/3' sub templated	3	0
MIR408	UGCACUGCCUCUUCCCUG	Scaffold 07571	AUGCACUGCCUCUUCCCUGGC	Pinus taeda	141	18	4		3'	Sense	46.81	53.19	72.9	51.7021	0.972027	5' and 3' sub templated	3	0
MIR408	UGCACUGCCUCUUCCCUGG	Scaffold 07571	AUGCACUGCCUCUUCCCUGGC	Pinus taeda	141	19	5		3'	Sense	46.81	53.19	72.9	51.7021	0.972027	5' and 3' sub templated	2	0
MIR172a	GGAAUCUUGAUGAUGCUGCAG	Scaffold 06705	GGAAUCUUGAUGAUGCUGCAG	Cucumis melo	167	21	3		3'	Sense	52.7	47.3	77	46.1078	0.974795	Exact Match	0	0
MIR399a	UGCCAAAGGAGAGUUGCCCUG	Scaffold 11425	UGCCAAAGGAGAGUUGCCCUG	Phaseolus vulgaris	119	21	3		3'	Sense	52.95	47.05	54.6	45.8824	0.975183	Exact Match	0	0
MIR399a	UGCCAAAGGAGAGUUGCCC	Scaffold 11425	UGCCAAAGGAGAGUUGCCCUG	Phaseolus vulgaris	119	19	3		3'	Sense	52.95	47.05	54.6	45.8824	0.975183	3' sub templated	2	0
MIR399d	UCCGCCAAAGGAGAGUUGCCCU	Scaffold 11425	UGCCAAAGGAGAGUUGCCCUU	Cucumis melo	119	22	3		3'	Sense	52.95	47.05	54.6	45.8824	0.975183	5' super/ 3' sub polymorphic	3	1
MIR166a//MIR166c//MIR166d	GGAAUGUUGUCUGGCUCGA	Scaffold 00977	GGAAUGUUGUCUGGCUCGAGG	Arabidopsis lyrata	133	19	4		5'	Sense	60.91	39.09	50.7	38.1203	0.975193	3' sub templated	2	0
MIR167a//MIR167b	UGAAGCUGCCAGCAUGAUCUA	Scaffold 11998	UGAAGCUGCCAGCAUGAUCUA	Arabidopsis lyrata	119	21	1	1 (1 nt)	3'	Antisense	57.1	42.9	49.8	41.8487	0.975495	Exact Match	0	0
MIR408a	AAGACUGGGAACAGGCAGAGCA	Scaffold 07571	AAGACUGGGAACAGGCAGAGCA	Hevea brasiliensis	141	22	5	1 (1 nt)	5'	Sense	47.52	52.48	72.9	51.7021	0.985178	Exact Match	0	0
MIR167b	GGUCAUGCUCUGACAGCCUCACU	Scaffold 11998	GGUCAUGCUCUGACAGCCUCACU	Arabidopsis lyrata	106	23	2	1 (2 nts)	5'	Antisense	53.78	46.22	48.3	45.566	0.985851	Exact Match	0	0
MIR167b	AGGUCAUGCUCUGACAGCCUCACU	Scaffold 11998	GGUCAUGCUCUGACAGCCUCACU	Arabidopsis lyrata	106	24	2	1 (2nt)	5'	Antisense	53.78	46.22	48.3	45.566	0.985851	5' super templated	1	0
MIR167c	UGAAGCUGCCAGCAUGAUCUAG	Scaffold 11998	UGAAGCUGCCAGCAUGAUCUA	Brassica napus	106	22	1		3'	Antisense	53.78	46.22	48.3	45.566	0.985851	3' super templated	1	0
MIR319a	ACUUGGACUGAAGGGAGCUCCC	Scaffold 10122	UUGGACUGAAGGGAGCUCCC	Cucumis melo	176	22	6		3'	Sense	55.69	44.31	76.9	43.6932	0.986079	5' super templated	2	0
MIR319a//MIR319b	CUUGGACUGAAGGGAGCU	Scaffold 10122	CUUGGACUGAAGGGAGCUCC	Physcomitrella patens	176	18	4		3'	Sense	55.69	44.31	76.9	43.6932	0.986079	3' sub templated	2	0
MIR166a	GGAAUGUUGUCUGGCUCGAGGAC	Scaffold 03846	GGAAUGUUGUCUGGCUCGAGG	Arabidopsis lyrata	200	23	5		5'	Sense	66	34	67.5	33.75	0.992647	3' super templated	2	0
MIR166a	GAAUGUUGUCUGGCUCGAGGA	Scaffold 03846	GGAAUGUUGUCUGGCUCGAGG	Arabidopsis lyrata	200	21	5		5'	Sense	66	34	67.5	33.75	0.992647	5' sub/3' super templated	2	0
MIR156e	UUGACAGAAGAUAGAGGGCAC	Scaffold 04043	UUGACAGAAGAUAGAGGGCAC	Cucumis melo	124	21	4		3'	Antisense	53.23	46.77	57.6	46.4516	0.993192	Exact Match	0	0
MIR167	AGAUCAUGUGGCAGUUUCAC	Scaffold 10563	AGAUCAUGUGGCAGUUUCACC	Arachis hypogaea	92	20	1		3'	Sense	53.27	46.73	42.8	46.5217	0.995543	3' sub templated	1	0
MIR167h//MIR167i//MIR167j	UGAAGCUGCCAGCAUGAUCUUA	Scaffold 10563	UGAAGCUGCCAGCAUGAUCUUA	Malus domestica	92	22	2	1 (1nt)	5'	Sense	53.27	46.73	42.8	46.5217	0.995543	Exact Match	0	0
MIR162	UCGAUAAACCUCUGCAUCCAG	Scaffold 00889	UCGAUAAACCUCUGCAUCCAG	Pinus densata	112	21	2		5'	Antisense	51.79	48.21	53.8	48.0357	0.996385	Exact Match	0	0
MIR162a	UCGAUAAACCUCUGCAUC	Scaffold 00889	UCGAUAAACCUCUGCAUCCA	Glycine max	112	18	2		5'	Antisense	51.79	48.21	53.8	48.0357	0.996385	3' sub templated	2	0
MIR162a	UCGAUAAACCUCUGCAUCCA	Scaffold00889	UCGAUAAACCUCUGCAUCCA	Glycine max	112	20	2		5'	Antisense	51.79	48.21	53.8	48.0357	0.996385	Exact Match	0	0
MIR535b	UUGACGACGAGAGAGAGCAC	Scaffold 05782	UGACGACGAGAGAGAGCACGC	Prunus persica	91	20	2		3'	Antisense	51.65	48.35	43.9	48.2418	0.997761	5' super/ 3' sub templated	3	0
MIR535b	UUGACGACGAGAGAGAGCACA	Scaffold 05782	UGACGACGAGAGAGAGCACGC	Prunus persica	91	21	2		3'	Antisense	51.65	48.35	43.9	48.2418	0.997761	5' super/ 3' sub polymorphic	3	1
MIR535d	UGACGACGAGAGAGAGCAC	Scaffold 05782	UGACGACGAGAGAGAGCACGC	Malus domestica	134	19	1		3'	Antisense	56.72	43.28	58.1	43.3582	1.00181	3' sub templated	2	0
MIR482	UCUUCCCAAUGUCGCCCAUUCC	Scaffold 04043	UCUUCCCAAUUCCGCCCAUUCC	Phaseolus vulgaris	141	22	3		5'	Antisense	61.71	38.29	54.3	38.5106	1.00576	polymorphic	2	2
MIR482b	GGAAUGGGCGGUUUGGGAAAA	Scaffold 04043	GGAAUGGGAGGAUUGGGAAAA	Prunus persica	141	21	2		3'	Antisense	61.71	38.29	54.3	38.5106	1.00576	polymorphic	2	2
MIR394	UUGGCAUUCUGUCCACCUCC	Scaffold 09683	UUGGCAUUCUGUCCACCUCC	Cynara cardunculus	151	20	3		5'	Sense	54.31	45.69	69.4	45.9603	1.00592	Exact Match	0	0
MIR160	GCAUACAGGGAGCCAGGC	Scaffold 12004	UGGCAUACAGGGAGCCAGGCA	Acacia auriculiformis	86	18	3		5'	Antisense	43.03	56.97	49.3	57.3256	1.00624	5' and 3' sub templated	3	0
MIR160a//MIR160b	UGCCUGGCUCCCUGUAUGCCA	Scaffold 00271	UGCCUGGCUCCCUGUAUGCCA	Picea abies	86	21	4		3'	Sense	44.19	55.81	48.3	56.1628	1.00632	Exact Match	0	0
MIR396c	UUCCACAGCUUUCUUGAACUUCU	Scaffold 04151	UUCCACAGCUUUCUUGAACUU	Cucumis melo	123	23			5'	Sense	59.35	40.65	50.6	41.1382	1.01201	3' super templated	2	0
MIR396e	UCAAGAAAGCUGUGGGAGAAC	Scaffold 04151	CUCAAGAAAGCUGUGGGAGA	Populus trichocarpa	123	21	1		3'	Sense	59.35	40.65	50.6	41.1382	1.01201	5' sub/ 3' super templated	3	0
MIR408a	AAGACUGGGAACAGGCAGAGC	Scaffold 07571	AAGACUGGGAACAGGCAGAGCA	Hevea brasiliensis	127	21	5	1 (1 nt)	5'	Sense	48.82	51.18	65.8	51.811	1.01233	3' sub templated	1	0
MIR390a//MIR390b	AAGCUCAGGAGGGAUAGCGCC	Scaffold 01061	AAGCUCAGGAGGGAUAGCGCC	Physcomitrella patens	123	21	3		3'	Antisense	67.48	32.52	40.5	32.9268	1.01251	Exact Match	0	0
MIR160d	UGCCUGGCUCCCUGAAUGCCA	Scaffold 04163	UGCCUGGCUCCCUGAAUGCCA	Carica papaya	88	21	3		3'	Antisense	47.73	52.27	46.6	52.9545	1.0131	Exact Match	0	0
MIR395d	ACUGAAGUGUUUGGGGGAACU	Scaffold 01497	CUGAAGUGUUUGGGGGAACUC	Linum usitatissimum	103	21	2		3'	Sense	44.67	55.33	58.1	56.4078	1.01948	5' super templated	1	0
MIR397	UCAUUGAGUGCAGCGUUGAUGA	Scaffold 09000	UCAUUGAGUGCAGCGUUGAUG	Ricinus communis	88	22	3		3'	Sense	59.1	40.9	36.8	41.8182	1.02245	3' super templated	1	0
MIR397	UCAUUGAGUGCAGCGUUGAUGAU	Scaffold 09000	UCAUUGAGUGCAGCGUUGACG	Picea abies	88	23	3		3'	Sense	59.1	40.9	36.8	41.8182	1.02245	3' super polymorphic	3	1
MIR397a//MIR397b	AUUGAGUGCAGCGUUGAU	Scaffold 09000	UCAUUGAGUGCAGCGUUGAUG	Arabidopsis lyrata	88	18	2		3'	Antisense	59.1	40.9	36.8	41.8182	1.02245	5' and 3' sub templated	3	0
MIR397a//MIR397b	CAUUGAGUGCAGCGUUGAUG	Scaffold 09000	UCAUUGAGUGCAGCGUUGAUG	Arabidopsis lyrata	88	20	3		3'	Antisense	59.1	40.9	36.8	41.8182	1.02245	5' sub templated	1	0
MIR397a//MIR397b	UCAUUGAGUGCAGCGUUGAU	Scaffold 09000	UCAUUGAGUGCAGCGUUGAUG	Arabidopsis lyrata	88	20	3		3'	Sense	59.1	40.9	36.8	41.8182	1.02245	3' sub templated	1	0
MIR396a	UUCCACAGCUUUCUUGAACUG	Scaffold 05297	UUCCACAGCUUUCUUGAACUG	Arabidopsis lyrata	130	21	1		5'	Sense	60	40	53.2	40.9231	1.02308	Exact Match	0	0
MIR396a	CCACAGCUUUCUUGAACUG	Scaffold 05297	UUCCACAGCUUUCUUGAACUG	Arabidopsis lyrata	130	19	1		5'	Sense	60	40	53.2	40.9231	1.02308	5' sub templated	2	0
MIR396a	UCAAUAAAGCUGUGGGAAG	Scaffold 05297	GUUCAAUAAAGCUGUGGGAAG	Arabidopsis lyrata	130	19	3		3'	Sense	60	40	53.2	40.9231	1.02308	5' sub templated	2	0
MIR396a	UCAAUAAAGCUGUGGGAAGA	Scaffold 05297	GUUCAAUAAAGCUGUGGGAAG	Arabidopsis lyrata	130	20	3		3'	Sense	60	40	53.2	40.9231	1.02308	5' sub/3' super templated	3	0
MIR396a	UUCAAUAAAGCUGUGGGAAG	Scaffold 05297	UUCAAUAAAGCUGUGGGAAG	Glycine max	130	20	3		3'	Sense	60	40	53.2	40.9231	1.02308	Exact Match	0	0
MIR396a	UUCAAUAAAGCUGUGGGAAGAU	Scaffold 05297	UUCAAUAAAGCUGUGGGAAG	Glycine max	130	22	3		3'	Sense	60	40	53.2	40.9231	1.02308	3' super templated	2	0
MIR396a	UUCCACAGCUUUCUUGAAC	Scaffold 05297	UUCCACAGCUUUCUUGAACUA	Picea abies	130	19	1		5'	Sense	60	40	53.2	40.9231	1.02308	3' sub templated	2	0
MIR396h	CACAGCUUUCUUGAACUG	Scaffold 05297	UCCACAGCUUUCUUGAACUG	Glycine max	130	18	1		5'	Sense	60	40	53.2	40.9231	1.02308	5' sub templated	2	0
MIR160a	GCGUAUGAGGAGCCAUGCAUA	Scaffold 00271	GCGUAUGAGGAGCCAUGCAUA	Arabidopsis lyrata	86	21	4		5'	Antisense	45.35	54.65	48.3	56.1628	1.02768	Exact Match	0	0
MIR482	CUUACCUACACCGCCCAUGCC	Scaffold 03363	CUUACCUACACCUCCCAUGCC	Medicago truncatula	113	21	1	1 (1 nt)	3'	Sense	53.1	46.9	54.6	48.3186	1.03025	polymorphic	1	1
MIR482	CUUACCUACACCGCCCAUGCCUU	Scaffold 03363	CUUACCUACACCUCCCAUGCC	Medicago truncatula	113	23	2	1 (1 nt)	3'	Sense	53.1	46.9	54.6	48.3186	1.03025	3' super polymorphic	3	2
MIR482b	CAUCUUACCUACACCGCCCAUGCC	Scaffold 03363	UCUUGCCUACACCGCCCAUGCC	Solanum lycopersicum	113	24	1	1 (1 nt)	3'	Sense	53.1	46.9	54.6	48.3186	1.03025	5' super polymorphic	3	2
MIR482b	UCUUACCUACACCGCCCAUG	Scaffold 03363	UCUUGCCUACACCGCCCAUGCC	Solanum lycopersicum	113	20	1	1 (1 nt)	3'	Sense	53.1	46.9	54.6	48.3186	1.03025	3' sub polymorphic	3	1
MIR166a	UCUCGGACCAGGCUUCAUUCCCC	Scaffold 10563	UCGGACCAGGCUUCAUUCCCC	Phaseolus vulgaris	95	23	5		5'	Antisense	50.53	49.47	48.5	51.0526	1.03199	5' super templated	2	0
MIR398	AGCGACCUGAGAUCACAUG	Scaffold 07991	GGAGCGACCUGAGAUCACAUG	Hevea brasiliensis	119	19	2		5'	Sense	46.22	53.78	66.1	55.5462	1.03284	5' sub templated	2	0
MIR398	AGCGACCUGAGAUCACAUGU	Scaffold 07991	GGAGCGACCUGAGAUCACAUG	Hevea brasiliensis	119	20	3		5'	Sense	46.22	53.78	66.1	55.5462	1.03284	5' super/ 3' sub templated	3	0
MIR398	GGAGCGACCUGAGAUCACA	Scaffold 07991	GGAGCGACCUGAGAUCACAUG	Hevea brasiliensis	119	19	2		5'	Sense	46.22	53.78	66.1	55.5462	1.03284	3' sub templated	2	0
MIR398	GGAGCGACCUGAGAUCACAUGU	Scaffold 07991	GGAGCGACCUGAGAUCACAUG	Hevea brasiliensis	119	22	3		5'	Sense	46.22	53.78	66.1	55.5462	1.03284	3' super templated	1	0
MIR398	UAUGUGUUCUCAGGUCGCCCCUG	Scaffold 07991	UGUGUUCUCAGGUCGCCCCUG	Cynara cardunculus	119	23	2		5'	Sense	46.22	53.78	66.1	55.5462	1.03284	5' super templated	2	0
MIR398	UGUGUUCUCAGGUCGCCCC	Scaffold 07991	UGUGUUCUCAGGUCGCCCCUG	Cynara cardunculus	119	19	2		5'	Sense	46.22	53.78	66.1	55.5462	1.03284	3' sub templated	2	0
MIR398	UGUGUUCUCAGGUCGCCCCU	Scaffold 07991	UGUGUUCUCAGGUCGCCCCUG	Cynara cardunculus	119	20	2		5'	Sense	46.22	53.78	66.1	55.5462	1.03284	3' sub templated	1	0
MIR166	UCGGACCAGGCUUCAUUCCCCC	Scaffold 11998	UCGGACCAGGCUUCAUUCCCCC	Citrus trifoliata	92	22	5		3'	Sense	52.18	47.82	45.6	49.5652	1.0365	Exact Match	0	0
MIR395d	CUGAAGUGUUUGGGGGAACU	Scaffold 07690	CUGAAGUGUUUGGGGGAACUC	Linum usitatissimum	102	20	2		3'	Sense	56.87	43.13	45.6	44.7059	1.03654	3' sub templated	1	0
MIR157d	CUCUCUAUGCUUCUGUCA	Scaffold 12711	GCUCUCUAUGCUUCUGUCAUC	Arabidopsis lyrata	137	18		1 (1 nt)	5'	Antisense	54.02	45.98	65.4	47.7372	1.03822	5' and 3' sub templated	3	0
MIR157d	GCUCUCUAUGCUUCUGUCA	Scaffold 12711	GCUCUCUAUGCUUCUGUCAUC	Arabidopsis lyrata	137	19		1 (1 nt)	5'	Antisense	54.02	45.98	65.4	47.7372	1.03822	3' sub templated	2	0
MIR535b	UUGACGACGAGAGAGAGCACAC	Scaffold 05782	UGACGACGAGAGAGAGCACGC	Prunus persica	111	22	2		3'	Antisense	54.06	45.94	53	47.7477	1.03935	5' super polymorphic	2	1
MIR535b	UUGACGACGAGAGAGAGCACACU	Scaffold 05782	UGACGACGAGAGAGAGCACGC	Prunus persica	111	23	2		3'	Antisense	54.06	45.94	53	47.7477	1.03935	5' super/ 3' super polymorphic	3	1
MIR535d	UGACGACGAGAGAGAGCACACU	Scaffold 05782	UGACGACGAGAGAGAGCACGC	Malus domestica	111	22	1		3'	Antisense	54.06	45.94	53	47.7477	1.03935	3' super polymorphic	2	1
MIR530a	UGCAUUUGCACCUGCACCUUA	Scaffold 04182	UGCAUUUGCACCUGCACCUU	Cucumis melo	150	21	1		5'	Sense	62	38	59.4	39.6	1.04211	3' super templated	1	0
MIR166b//MIR166a//MIR166c//MIR166d//MIR166e//MIR166g//MIR166h//MIR166i	UUCGGACCAGGCUUCAUUCCCC	Scaffold 11998	UCGGACCAGGCUUCAUUCCCC	Physcomitrella patens	82	22	5		3'	Sense	52.44	47.56	40.7	49.6341	1.04361	5' super templated	1	0
MIR166p	UUCGGACCAGGCUUCAUUCCC	Scaffold 11998	UCGGACCAGGCUUCAUUCCC	Glycine max	82	21	5		3'	Sense	52.44	47.56	40.7	49.6341	1.04361	5' super templated	1	0
MIR6445a//MIR6445b	UCAUUCCUCUUCCUAAAAUGG	Scaffold 08359	UUCAUUCCUCUUCCUAAAAUGG	Populus trichocarpa	100	21	1	1 (1 nt)	5'	Sense	66	34	35.5	35.5	1.04412	5' sub templated	1	0
MIR6445a//MIR6445b	UUCAUUCCUCUUCCUAAAAUGGU	Scaffold 08359	UUCAUUCCUCUUCCUAAAAUGG	Populus trichocarpa	100	23	1	1 (1 nt)	5'	Sense	66	34	35.5	35.5	1.04412	3' super non-templated	1	1
MIR156	UGUUGACAGAAGAUAGAGAGC	Scaffold 08935	UUGACAGAAGAUAGAGAGC	Hevea brasiliensis	149	21	1	1 (1 nt)	5'	Sense	57.05	42.95	67	44.9664	1.04695	5' super templated	2	0
MIR156d	GCUCUCUAUGCUUCUGUCAUCU	Scaffold 08935	GCUCUCUAUGCUUCUGUCAUCA	Solanum tuberosum	149	22	3	1 (1 nt)	3'	Sense	57.05	42.95	67	44.9664	1.04695	polymorphic	1	1
MIR157d	GCUCUCUAUGCUUCUGUCAU	Scaffold 08935	GCUCUCUAUGCUUCUGUCAUC	Arabidopsis lyrata	149	20	1	1 (1 nt)	3'	Sense	57.05	42.95	67	44.9664	1.04695	3' sub templated	1	0
MIR157d	GCUCUCUAUGCUUCUGUCAUC	Scaffold 12711	GCUCUCUAUGCUUCUGUCAUC	Arabidopsis lyrata	149	21	2	1 (1 nt)	5'	Sense	57.05	42.95	67	44.9664	1.04695	Exact Match	0	0
MIR157d	UGCUCUCUAUGCUUCUGUCAUCU	Scaffold 08935	GCUCUCUAUGCUUCUGUCAUC	Arabidopsis lyrata	149	23	3	1 (1 nt)	3'	Sense	57.05	42.95	67	44.9664	1.04695	5' and 3' super non-templated	2	0
MIR827	UUAGAUGACCAUCAACAAACA	Scaffold 04024	UUAGAUGACCAUCAACAAACA	Manihot esculenta	102	21	4		3'	Sense	71.57	28.43	30.4	29.8039	1.04833	Exact Match	0	0
MIR396	UUCCACAGCUUUCUUGAACUU	Scaffold 05297	UUCCACAGCUUUCUUGAACUU	Pinus taeda	81	21	2		3'	Antisense	55.56	44.44	37.8	46.6667	1.05011	Exact Match	0	0
MIR396b//MIR396k	GCUCAAGAAAGCUGUGGGAGA	Scaffold 05297	GCUCAAGAAAGCUGUGGGAGA	Glycine max	81	21	3		5'	Antisense	55.56	44.44	37.8	46.6667	1.05011	Exact Match	0	0
MIR156q//MIR156s	UGACAGAAGAGAGUGAGCACU	Scaffold 07318	UGACAGAAGAGAGUGAGCACU	Glycine max	87	21	1		3'	Antisense	54.03	45.97	42	48.2759	1.05016	Exact Match	0	0
MIR171k	UUGAGCCGCGCCAAUAUCACUU	Scaffold 11970	UUGAGCCGCGCCAAUAUCACU	Glycine max	99	22	2		3'	Sense	58.59	41.41	43.1	43.5354	1.05132	3' super templated	1	0
MIR171k	UUGAGCCGCGCCAAUAUCACU	Scaffold 11970	UUGAGCCGCGCCAAUAUCACU	Glycine max	99	21	2		3'	Sense	58.6	41.4	43.1	43.5354	1.05158	Exact Match	0	0
MIR319c//MIR319d	GCUUGGACUGAAGGGAGCUCCCUU	Scaffold 03429	UUGGACUGAAGGGAGCUCCCU	Manihot esculenta	212	24	3		3'	Sense	59.44	40.56	90.5	42.6887	1.05248	5' and 3' super non-templated	3	0
MIR319	UGGACUGAAGGGAGCUCCCU	Scaffold 03429	UUGGACUGAAGGGAGCUCCCU	Cynara cardunculus	196	20	1		5'	Sense	58.68	41.32	85.3	43.5204	1.05325	5' sub templated	1	0
MIR167a//MIR167b	UGAAGCUGCCAGCAUGAUCUAA	Scaffold 11998	UGAAGCUGCCAGCAUGAUCUAA	Brassica napus	88	22	1	1 (1nt)	3'	Antisense	60.23	39.77	36.9	41.9318	1.05436	Exact Match	0	0
MIR396a	GUUCAAUAAAGCUGUGGGA	Scaffold 05297	GUUCAAUAAAGCUGUGGGAAG	Arabidopsis lyrata	132	19	1		3'	Sense	60.61	39.39	54.9	41.5909	1.05587	3' sub templated	1	0
MIR396a	UUCAAUAAAGCUGUGGGA	Scaffold 05297	GUUCAAUAAAGCUGUGGGAAG	Arabidopsis lyrata	132	18	1		3'	Sense	60.61	39.39	54.9	41.5909	1.05587	5' and 3' sub templated	3	0
MIR156	UUGACAGAAGAUAGAGAGC	Scaffold 12711	UUGACAGAAGAUAGAGAGC	Hevea brasiliensis	139	19	1	1 (1 nt)	3'	Antisense	54.68	45.32	67	48.2014	1.06358	Exact Match	0	0
MIR156c	UUGACAGAAGAUAGAGAGCAC	Scaffold 12711	UUGACAGAAGAUAGAGAGCAC	Cynara cardunculus	139	21	1	1 (1nt)	3'	Antisense	54.68	45.32	67	48.2014	1.06358	Exact Match	0	0
MIR156c	UUGACAGAAGAUAGAGAGCACUC	Scaffold 12711	UUGACAGAAGAUAGAGAGCAC	Cynara cardunculus	139	23			3'	Antisense	54.68	45.32	67	48.2014	1.06358	3' super non-templated	2	0
MIR156d	GCUCUCUAUGCUUCUGUCAUCA	Scaffold 12711	GCUCUCUAUGCUUCUGUCAUCA	Solanum tuberosum	139	22		1 (1 nt)	3'	Sense	54.68	45.32	67	48.2014	1.06358	Exact Match	0	0
MIR166a	CUCGGACCAGGCUUCAUUCC	Scaffold 10563	UCGGACCAGGCUUCAUUCCCC	Phaseolus vulgaris	97	20	5		5'	Antisense	51.55	48.45	50	51.5464	1.06391	5' super/3' sub templated	3	0
MIR166a	CUCGGACCAGGCUUCAUUCCCC	Scaffold 10563	UCGGACCAGGCUUCAUUCCCC	Phaseolus vulgaris	97	22	5		5'	Antisense	51.55	48.45	50	51.5464	1.06391	5' super templated	1	0
MIR166e	AUCUCGGACCAGGCUUCAUUCCCC	Scaffold 10563	CUCGGACCAGGCUUCAUUCCC	Brachypodium distachyon	97	24	5		5'	Antisense	51.55	48.45	50	51.5464	1.06391	5' super templated	2	0
MIR166u	UCUCGGACCAGGCUUCAUUC	Scaffold 10563	UCUCGGACCAGGCUUCAUUC	Glycine max	97	20	5		5'	Antisense	51.55	48.45	50	51.5464	1.06391	Exact Match	0	0
MIR2950	UUCCAUCUCUUGCACACUGGA	Scaffold 03235	UUCCAUCUCUUGCACACUGGA	Manihot esculenta	86	21	4		3'	Antisense	54.66	45.34	41.5	48.2558	1.06431	Exact Match	0	0
MIR2950	AUUCCAUCUCUUGCACACUGG	Scaffold 03235	UUCCAUCUCUUGCACACUGGA	Manihot esculenta	86	21	4		3'	Antisense	54.66	45.34	41.5	48.2558	1.06431	5' super/3' sub templated	2	0
MIR2950	UUCCAUCUCUUGCACACUGG	Scaffold 03235	UUCCAUCUCUUGCACACUGGA	Manihot esculenta	86	20	4		3'	Antisense	54.66	45.34	41.5	48.2558	1.06431	3' sub templated	1	0
MIR319	CUUGGACUGAAGGGAGCUCCCUUU	Scaffold 03429	UUGGACUGAAGGGAGCUCCCU	Hevea brasiliensis	212	24	4		3'	Sense	59.91	40.09	90.5	42.6887	1.06482	5' and 3' super templated	3	0
MIR6445a//MIR6445b	UUCAUUCCUCUUCCUAAAAUGGUU	Scaffold 12794	UUCAUUCCUCUUCCUAAAAUGG	Populus trichocarpa	102	24	2	1 (1 nt)	3'	Antisense	62.75	37.25	40.5	39.7059	1.06593	3' super non-templated	2	1
MIR170//MIR171a	UAUUGGCCUGGUUCACUCA	Scaffold 07520	UAUUGGCCUGGUUCACUCAGA	Arabidopsis lyrata	109	19	2		5'	Sense	56.89	43.11	50.1	45.9633	1.06619	3' sub templated	2	0
MIR171j	AUUGGCCUGGUUCACUCAGAC	Scaffold 07520	UAUUGGCCUGGUUCACUCAGA	Glycine max	140	21	2		5'	Sense	59.29	40.71	60.8	43.4286	1.06678	5' sub/3' super templated	2	0
MIR171j	UAUUGGCCUGGUUCACUCAGAC	Scaffold 07520	UAUUGGCCUGGUUCACUCAGA	Glycine max	140	22	2		5'	Sense	59.29	40.71	60.8	43.4286	1.06678	3' super templated	2	0
MIR171j	UAUUGGCCUGGUUCACUCAGACA	Scaffold 07520	UAUUGGCCUGGUUCACUCAGA	Glycine max	140	23	2		5'	Sense	59.29	40.71	60.8	43.4286	1.06678	3' super templated	1	0
MIR393a//MIR393b//MIR393c	CAAAGGGAUCGCAUUGAUC	Scaffold 12439	UCCAAAGGGAUCGCAUUGAUCC	Helianthus tuberosus	95	19	1	1 (1 nt)	3'	Antisense	61.06	38.94	39.5	41.5789	1.06777	5' and 3' sub templated	3	0
MIR393a//MIR393b//MIR393c	UCCAAAGGGAUCGCAUUGAUCC	Scaffold 12439	UCCAAAGGGAUCGCAUUGAUCC	Helianthus tuberosus	95	22	1		3'	Antisense	61.1	38.9	39.5	41.5789	1.06887	Exact Match	0	0
MIR164a//MIR164b	UGGAGAAGCAGGGCACGUGCA	Scaffold 04457	UGGAGAAGCAGGGCACGUGCA	Arabidopsis lyrata	111	21	2		5'	Sense	53.16	46.84	55.8	50.2703	1.07323	Exact Match	0	0
MIR319b	GCUUGGACUGAAGGGAGCUCCCU	Scaffold 06557	UUGGACUGAAGGGAGCUCCCU	Arabidopsis lyrata	197	23	3		3'	Sense	57.87	42.13	89.4	45.3807	1.07716	5' super templated	2	0
MIR157d	UGCUCUCUAUGCUUCUGUCAUC	Scaffold 12711	GCUCUCUAUGCUUCUGUCAUC	Arabidopsis lyrata	99	22		1 (1 nt)	5'	Antisense	56.57	43.43	46.4	46.8687	1.07918	5' super templated	1	0
MIR157d	GCUCUCUAUGCUUCUGUCAUCAC	Scaffold 12711	GCUCUCUAUGCUUCUGUCAUC	Arabidopsis lyrata	99	23		1 (1 nt)	5'	Antisense	56.57	43.43	46.4	46.8687	1.07918	3' super templated	2	0
MIR166a	CUCGGACCAGGCUUCAUUCCC	Scaffold 01551	UCGGACCAGGCUUCAUUCCCC	Phaseolus vulgaris	96	21	2		3'	Sense	52.09	47.91	49.7	51.7708	1.08059	5' super/3' sub templated	2	0
MIR166a	UCUCGGACCAGGCUUCAUUCCC	Scaffold 01551	UCGGACCAGGCUUCAUUCCCC	Phaseolus vulgaris	96	22	2		3'	Sense	52.09	47.91	49.7	51.7708	1.08059	5' super/3' sub templated	3	0
MIR166g	GGAAUGUUGUUUGGCUCGAGG	Scaffold 06914	GGAAUGUUGUUUGGCUCGAGG	Arabidopsis lyrata	148	21	4		5'	Sense	60.8	39.2	62.7	42.3649	1.08074	Exact Match	0	0
MIR166h	UCGGACCAGGCUUCAUUCCCGU	Scaffold 06914	UCGGACCAGGCUUCAUUCCCGU	Manihot esculenta	148	22	4		3'	Sense	60.82	39.18	62.7	42.3649	1.08129	Exact Match	0	0
MIR166h	CUCGGACCAGGCUUCAUUCCCGUC	Scaffold 06914	UCGGACCAGGCUUCAUUCCCGU	Manihot esculenta	148	24	4		3'	Sense	60.82	39.18	62.7	42.3649	1.08129	5' and 3' super templated	2	0
MIR166g	GAAUGUUGUUUGGCUCGAGG	Scaffold 05979	GGAAUGUUGUUUGGCUCGAGG	Arabidopsis lyrata	164	20	4		5'	Sense	60.37	39.63	70.3	42.8659	1.08165	5' sub templated	1	0
MIR171k//MIR171l	CGAUGUUGGUGAGGUUCAAUC	Scaffold 05760	CGAUGUUGGUGAGGUUCAAUC	Glycine max	97	21	2		5'	Sense	58.77	41.23	43.4	44.7423	1.08519	Exact Match	0	0
MIR319	UGGACUGAAGGGAGCUCCCUU	Scaffold 10122	UUGGACUGAAGGGAGCUCCCU	Cynara cardunculus	197	21	1		3'	Sense	58.38	41.62	89.4	45.3807	1.09036	5' and 3' sub templated	2	0
MIR393	UCCAAAGGGAUCGCAUUGAUC	Scaffold 00341	UCCAAAGGGAUCGCAUUGAUC	Brassica napus	128	21	1	1 (1nt)	3'	Sense	59.38	40.62	56.7	44.2969	1.09052	Exact Match	0	0
MIR393d	CCAAAGGGAUCGCAUUGAUCUA	Scaffold 000341	UCCAAAGGGAUCGCAUUGAUCU	Manihot esculenta	128	22	1	1 (1 nt)	5'	Sense	59.38	40.62	56.7	44.2969	1.09052	5' sub/3' super templated	2	0
MIR393h//MIR393i//MIR393j//MIR393k	UUCCAAAGGGAUCGCAUUGA	Scaffold 000341	UUCCAAAGGGAUCGCAUUGAUC	Glycine max	128	20	1	1 (1 nt)	5'	Sense	59.38	40.62	56.7	44.2969	1.09052	3' sub templated	2	0
MIR530	UCUGCAUUUGCACCUGCACCU	Scaffold 04182	UCUGCAUUUGCACCUGCACCU	Prunus persica	170	21			5'	Sense	62.36	37.64	69.9	41.1176	1.09239	Exact Match	0	0
MIR396	UCCCACAGCUUUCUUGAACUU	Scaffold 12498	UCCCACGGCUUUCUUGAACUU	Pinus densata	111	21	2		5'	Sense	58.56	41.44	50.4	45.4054	1.09569	polymorphic	1	1
MIR169d//MIR169e//MIR169f//MIR169g	UGAGCCAAGGAUGACUUGCCG	Scaffold 03264	UGAGCCAAGGAUGACUUGCCG	Arabidopsis lyrata	151	21	1	1 (1 nt)	5'	Sense	52.3	47.7	79	52.3179	1.09681	Exact Match	0	0
MIR319a	AGAGCUUCCUUCAGUCCACUC	Scaffold 06557	AGAGCUUCCUUCAGUCCACUC	Medicago truncatula	206	21	3		5'	Sense	59.23	40.77	92.8	45.0485	1.10494	Exact Match	0	0
MIR319b	CUUGGACUGAAGGGAGCUCCCU	Scaffold 06557	UUGGACUGAAGGGAGCUCCCU	Arabidopsis lyrata	206	22	3		3'	Sense	59.23	40.77	92.8	45.0485	1.10494	5' super templated	1	0
MIR169a//MIR169b//MIR169c//MIR169d//MIR169e//MIR169f//MIR169g//MIR169h	UAGACAAGGAUGACUUGCCU	Scaffold 00363	UAGCCAAGGAUGACUUGCCU	Solanum tuberosum	147	20		2 (1 nt each)	3'	Antisense	48.98	51.02	83.2	56.5986	1.10934	polymorphic	1	1
MIR169i//MIR169j//MIR169l	UAGCCAAGGAUGACUUGCCUGA	Scaffold 03800	UAGCCAAGGAUGACUUGCCUG	Arabidopsis lyrata	188	22		2 (1 nt each)	3'	Antisense	60.11	39.89	83.2	44.2553	1.10943	3' sub templated	1	0
MIR319	UGGACUGAAGGGAGCUCC	Scaffold 06557	UUGGACUGAAGGGAGCUCC	Pinus taeda	199	18	1		3'	Sense	58.8	41.2	91	45.7286	1.10992	5' sub templated	1	0
MIR319	UUGGACUGAAGGGAGCUCCCUUU	Scaffold 06557	UUGGACUGAAGGGAGCUCCCU	Hevea brasiliensis	199	23	3		3'	Sense	58.8	41.2	91	45.7286	1.10992	3' super templated	2	0
MIR319c//MIR319e	UGGACUGAAGGGAGCUCCC	Scaffold 06557	CUUGGACUGAAGGGAGCUCCC	Physcomitrella patens	199	19	1		3'	Sense	58.8	41.2	91	45.7286	1.10992	5' sub templated	2	0
MIR319e	GCUUGGACUGAAGGGAGCUCCC	Scaffold 06557	UUGGACUGAAGGGAGCUCCC	Glycine max	199	22	3		3'	Sense	58.8	41.2	91	45.7286	1.10992	5' super templated	2	0
MIR319b//MIR319a	UUGGACUGAAGGGAGCUCCC	Scaffold 06557	UUGGACUGAAGGGAGCUCCC	Cucumis melo	201	20	2		3'	Sense	58.7	41.3	92.3	45.9204	1.11187	Exact Match	0	0
MIR319c//MIR319e	CUUGGACUGAAGGGAGCUCCC	Scaffold 06557	CUUGGACUGAAGGGAGCUCCC	Physcomitrella patens	201	21	3		3'	Sense	58.7	41.3	92.3	45.9204	1.11187	Exact Match	0	0
MIR319a	GAGAGCUUCCUUCAGUCCACU	Scaffold 06557	AGAGCUUCCUUCAGUCCACUC	Medicago truncatula	201	21	3		5'	Sense	58.71	41.29	92.3	45.9204	1.11214	5' super/ 3' sub templated	2	0
MIR396b	UUCCACAGCUUUCUUGAACU	Scaffold 12498	UUCCACAGCUUUCUUGAACU	Vitis vinifera	113	20	2		3'	Antisense	59.3	40.7	51.3	45.3982	1.11544	Exact Match	0	0
MIR396e	CUCAAGAAAGCUGUGGGAGA	Scaffold 05760	CUCAAGAAAGCUGUGGGAGA	Populus trichocarpa	112	20	3		3'	Sense	59.82	40.18	50.3	44.9107	1.11774	Exact Match	0	0
MIR396	GCUCAAGAAAGCUGUGGG	Scaffold 05760	AAGCUCAAGAAAGCUGUGGGA	Avicennia marina	112	18	1		3'	Sense	59.83	40.17	50.3	44.9107	1.11802	5' and 3' sub templated	3	0
MIR396	UUCCACAGCUUUCUUGAACUUU	Scaffold 05760	UUCCACAGCUUUCUUGAACUU	Pinus taeda	112	22	1		5'	Sense	59.83	40.17	50.3	44.9107	1.11802	3' super templated	1	0
MIR396b//MIR396k	CUCAAGAAAGCUGUGGGAG	Scaffold 05760	GCUCAAGAAAGCUGUGGGAGA	Glycine max	112	19	2		3'	Sense	59.83	40.17	50.3	44.9107	1.11802	5' and 3' sub templated	2	0
MIR396e	CUCAAGAAAGCUGUGGGAGAA	Scaffold 05760	CUCAAGAAAGCUGUGGGAGA	Populus trichocarpa	112	21	4		3'	Sense	59.83	40.17	50.3	44.9107	1.11802	3' super templated	1	0
MIR399a	CCGCCAAAGGAGAGUUGCCCUU	Scaffold 07088	CGCCAAAGGAGAGUUGCCCUU	Prunus persica	122	22	5		3'	Sense	59.02	40.98	56.2	46.0656	1.1241	5' super templated	1	0
MIR399e	UGCCAAAGGAGAAUUGCCCUG	Scaffold 04003	UGCCAAAGGAGAAUUGCCCUG	Citrus sinensis	119	21	1		3'	Sense	57.99	42.01	56.2	47.2269	1.12418	Exact Match	0	0
MIR166	UCGGACCAGGCUUCAUUCCCCCCA	Scaffold 02906	UCGGACCAGGCUUCAUUCCCCC	Citrus trifoliata	95	24	3		3'	Sense	53.69	46.31	49.7	52.3158	1.12969	3' super templated	2	0
MIR166b//MIR166a//MIR166c//MIR166d//MIR166e//MIR166g//MIR166h//MIR166i	UUCGGACCAGGCUUCAUUCC	Scaffold 02906	UCGGACCAGGCUUCAUUCCCC	Physcomitrella patens	95	20	3		3'	Sense	53.69	46.31	49.7	52.3158	1.12969	5' super/3' sub templated	3	0
MIR166e//MIR166h	UUUCGGACCAGGCUUCAUUCCCC	Scaffold 02906	UCGGACCAGGCUUCAUUCCCC	Physcomitrella patens	95	23	3		3'	Sense	53.69	46.31	49.7	52.3158	1.12969	5' super templated	2	0
MIR166p	UUUCGGACCAGGCUUCAUUCCC	Scaffold 02906	UCGGACCAGGCUUCAUUCCC	Glycine max	95	22	3		3'	Sense	53.69	46.31	49.7	52.3158	1.12969	5' super templated	2	0
MIR166d	CUCGGACCAGGCUUCAUUCCCG	Scaffold 05979	UCGGACCAGGCUUCAUUCCCG	Carica papaya	145	22	4		3'	Sense	61.38	38.62	63.3	43.6552	1.13038	5' super templated	1	0
MIR166d	UCGGACCAGGCUUCAUUCCCG	Scaffold 05979	UCGGACCAGGCUUCAUUCCCG	Carica papaya	145	21	4		3'	Sense	61.38	38.62	63.3	43.6552	1.13038	Exact Match	0	0
MIR166d	UCUCGGACCAGGCUUCAUUCCCG	Scaffold 05979	UCGGACCAGGCUUCAUUCCCG	Carica papaya	145	23	4		3'	Sense	61.38	38.62	63.3	43.6552	1.13038	5' super templated	2	0
MIR164	GGAGAAGCAGGGCACGUG	Scaffold 11668	UGGAGAAGCAGGGCACGUGCG	Cunninghamia lanceolata	89	18	2		5'	Sense	44.95	55.05	55.9	62.809	1.14094	5' and 3' sub templated	3	0
MIR396a	UUCAAGAAAGCUGUGGGA	Scaffold 12498	GUUCAAGAAAGCUGUGGGAAA	Cynara cardunculus	90	18	2		5'	Antisense	60	40	41.4	46	1.15	5' and 3' sub templated	3	0
MIR396c	UCCACAGCUUUCUUGAACUUC	Scaffold 12498	UUCCACAGCUUUCUUGAACUU	Cucumis melo	90	21	1		3'	Antisense	60	40	41.4	46	1.15	5' sub/ 3' super templated	2	0
MIR396c	UUCCACAGCUUUCUUGAACUUC	Scaffold 12498	UUCCACAGCUUUCUUGAACUU	Cucumis melo	90	22	1		3'	Antisense	60	40	41.4	46	1.15	3' super templated	1	0
MIR393c//MIR393d	UCCAAAGGGAUCGCAUUGAUCU	Scaffold 11425	UCCAAAGGGAUCGCAUUGAUCU	Manihot esculenta	134	22	2	1 (1nt)	5'	Sense	58.96	41.04	63.6	47.4627	1.1565	Exact Match	0	0
MIR393h//MIR393i//MIR393j//MIR393k	UUCCAAAGGGAUCGCAUUGAUC	Scaffold 11425	UUCCAAAGGGAUCGCAUUGAUC	Glycine max	134	22	1	1 (1 nt)	5'	Sense	58.96	41.04	63.6	47.4627	1.1565	Exact Match	0	0
MIR827	UUAGAUGACCAUCAACAAAC	Scaffold 04024	UUAGAUGACCAUCAACAAACG	Arabidopsis lyrata	90	20	3		3'	Antisense	73.34	26.66	27.9	31	1.16279	3' sub templated	1	0
MIR169t//MIR169v	UAGCCAAGGAUGACUUGCCCGA	Scaffold 05005	UAGCCAAGGAUGACUUGCCCG	Manihot esculenta	150	22	1	2 (1 nt each)	5'	Sense	58.67	41.33	72.1	48.0667	1.163	3' super templated	1	0
MIR169r//MIR169t//MIR169v//MIR169x//MIR169z	UAGCCAAGGAUGACUUGCCCG	Scaffold 05005	UAGCCAAGGAUGACUUGCCCG	Manihot esculenta	187	21		2 (1 nt each)	5'	Sense	57.76	42.24	91.9	49.1444	1.16346	Exact Match	0	0
MIR482	CUUACCUACACCGCCCAUGC	Scaffold 03363	CUUACCUACACCUCCCAUGCC	Medicago truncatula	154	20	1	1 (1 nt)	3'	Sense	51.3	48.7	87.3	56.6883	1.16403	3' sub templated	1	1
MIR482	UACCUACACCGCCCAUGCC	Scaffold 03363	CUUACCUACACCUCCCAUGCC	Medicago truncatula	154	19	1	1 (1 nt)	3'	Sense	51.3	48.7	87.3	56.6883	1.16403	5' sub polymorphic	3	1
MIR482b	AUCUUACCUACACCGCCCAUGC	Scaffold 03363	UCUUGCCUACACCGCCCAUGCC	Solanum lycopersicum	154	22	1	1 (1 nt)	3'	Sense	51.3	48.7	87.3	56.6883	1.16403	5' super/ 3' sub polymorphic	3	1
MIR482	UCUUACCUACACCGCCCAUGCCU	Scaffold 03363	CUUACCUACACCUCCCAUGCC	Medicago truncatula	114	23	2	1 (1 nt)	3'	Sense	34.22	65.78	87.3	76.5789	1.16417	5' super/ 3' super polymorphic	2	1
MIR482	CUUACCUACACCGCCCAUGCCU	Scaffold 03363	CUUACCUACACCUCCCAUGCC	Medicago truncatula	114	22	2	1 (1 nt)	3'	Sense	34.22	65.78	87.3	76.5789	1.16417	3' super polymorphic	2	1
MIR482	UUACCUACACCGCCCAUGCC	Scaffold 03363	CUUACCUACACCUCCCAUGCC	Medicago truncatula	114	20	1	1 (1 nt)	3'	Sense	34.22	65.78	87.3	76.5789	1.16417	5' sub polymorphic	2	1
MIR482	UUACCUACACCGCCCAUGCCU	Scaffold 03363	CUUACCUACACCUCCCAUGCC	Medicago truncatula	114	21	1	1 (1 nt)	3'	Sense	34.22	65.78	87.3	76.5789	1.16417	5' sub/ 3' super polymorphic	3	1
MIR482b	AUCUUACCUACACCGCCCAUGCC	Scaffold 03363	UCUUGCCUACACCGCCCAUGCC	Solanum lycopersicum	114	23	1	1 (1 nt)	3'	Sense	34.22	65.78	87.3	76.5789	1.16417	5' super polymorphic	2	1
MIR482b	UCUUACCUACACCGCCCAUGC	Scaffold 03363	UCUUGCCUACACCGCCCAUGCC	Solanum lycopersicum	114	21	1	1 (1 nt)	3'	Sense	34.22	65.78	87.3	76.5789	1.16417	3' sub polymorphic	2	1
MIR482b	UCUUACCUACACCGCCCAUGCC	Scaffold 03363	UCUUGCCUACACCGCCCAUGCC	Solanum lycopersicum	114	22	1	1 (1 nt)	3'	Sense	34.22	65.78	87.3	76.5789	1.16417	polymorphic	1	1
MIR6445a//MIR6445b	UUCAUUCCUCUUCCUAAAAUGG	Scaffold 12794	UUCAUUCCUCUUCCUAAAAUGG	Populus trichocarpa	122	22	1	1 (1nt)	3'	Antisense	60.66	39.34	56	45.9016	1.16679	Exact Match	0	0
MIR393	UCCAAAGGGAUCGCAUUGA	Scaffold 11425	UCCAAAGGGAUCGCAUUGAUC	Brassica napus	136	19	1	1 (1 nt)	5'	Sense	59.56	40.44	64.6	47.5	1.17458	3' sub templated	2	0
MIR393c	UUCCAAAGGGAUCGCAUUGAUCUG	Scaffold 11425	UCCAAAGGGAUCGCAUUGAUCU	Manihot esculenta	136	24	3	1 (1 nt)	5'	Sense	59.56	40.44	64.6	47.5	1.17458	5' and 3' super templated	2	0
MIR393c//MIR393d	UUCCAAAGGGAUCGCAUUGAUCU	Scaffold 11425	UCCAAAGGGAUCGCAUUGAUCU	Manihot esculenta	136	23	1	1 (1 nt)	5'	Sense	59.56	40.44	64.6	47.5	1.17458	5' super templated	1	0
MIR393h//MIR393i//MIR393j//MIR393k	UUCCAAAGGGAUCGCAUUGAU	Scaffold 11425	UUCCAAAGGGAUCGCAUUGAUC	Glycine max	136	21	1	1 (1 nt)	5'	Sense	59.56	40.44	64.6	47.5	1.17458	3' sub templated	1	0
MIR157d	UGACAGAAGAUAGAGAGCAC	Scaffold 06871	UGACAGAAGAUAGAGAGCAC	Arabidopsis lyrata	124	20		1 (1 nt on miRNA*)	3'	Antisense	54.033	45.967	67	54.0323	1.17546	Exact Match	0	0
MIR156c	UUGACAGAAGAGAGAGAGCAC	Scaffold 06871	UUGACAGAAGAGAGAGAGCAC	Arachis hypogaea	124	21	1		3'	Antisense	54.04	45.96	67	54.0323	1.17564	Exact Match	0	0
MIR156c	UUGACAGAAGAUAGAGAGCACA	Scaffold 06871	UUGACAGAAGAUAGAGAGCAC	Helianthus annuus	124	22	1		3'	Sense	54.04	45.96	67	54.0323	1.17564	3' super templated	1	0
MIR156g	ACAGAAGAUAGAGAGCACAG	Scaffold 06871	ACAGAAGAUAGAGAGCACAG	Glycine max	124	20	1		3'	Antisense	54.04	45.96	67	54.0323	1.17564	Exact Match	0	0
MIR396b//MIR396k	GCUCAAGAAAGCUGUGGGAGAA	Scaffold 05297	GCUCAAGAAAGCUGUGGGAGA	Glycine max	70	22	3		5'	Antisense	60	40	33.2	47.4286	1.18571	3' super templated	1	0
MIR399a	CGCCAAAGGAGAGUUGCCCUU	Scaffold 07088	CGCCAAAGGAGAGUUGCCCUU	Prunus persica	126	21	5		3'	Sense	61.12	38.88	58.2	46.1905	1.18803	Exact Match	0	0
MIR399a	CGCCAAAGGAGAGUUGCCCU	Scaffold 07088	CGCCAAAGGAGAGUUGCCCUG	Theobroma cacao	126	20	4		3'	Sense	61.12	38.88	58.2	46.1905	1.18803	3' sub templated	1	0
MIR399a	UGCCAAAGGAGAGUUGCCCU	Scaffold 07088	UGCCAAAGGAGAGUUGCCCUG	Phaseolus vulgaris	126	20	3		3'	Sense	61.12	38.88	58.2	46.1905	1.18803	3' sub templated	1	0
MIR477	ACUCUCCCUCAAAGGCUUCUAG	Scaffold 02226	ACUCUCCCUCAAAGGCUUCUAG	Prunus persica	105	22	4		5'	Sense	50.48	49.52	62.2	59.2381	1.19625	Exact Match	0	0
MIR393c	UUCCAAAGGGAUCGCAUUGAUCUGA	Scaffold 11425	UCCAAAGGGAUCGCAUUGAUCU	Manihot esculenta	136	25	3	1 (1 nt)	5'	Sense	60.3	39.7	64.6	47.5	1.19647	5' and 3' super templated	3	0
MIR156f	AUUGACAGAAGAGAGUGAGCAC	Scaffold 03049	UGACAGAAGAGAGUGAGCAC	Brassica napus	90	22	1		5'	Sense	57.78	42.22	47.8	53.1111	1.25796	5' super templated	2	0
MIR156j	UUGACAGAAGAGAGUGAGC	Scaffold 03049	GUUGACAGAAGAGAGUGAGCAC	Cucumis melo	90	19			5'	Sense	57.78	42.22	47.8	53.1111	1.25796	5' and 3' sub templated	3	0
MIR156k//MIR156n//MIR156o	AAUUGACAGAAGAGAGUGAGCA	Scaffold 03049	UUGACAGAAGAGAGUGAGCAC	Glycine max	90	22	1		5'	Sense	57.78	42.22	47.8	53.1111	1.25796	5' super/ 3' sub templated	3	0
MIR156k//MIR156n//MIR156o	AAUUGACAGAAGAGAGUGAGCAC	Scaffold 03049	UUGACAGAAGAGAGUGAGCAC	Glycine max	90	23	1		5'	Sense	57.78	42.22	47.8	53.1111	1.25796	5' super templated	2	0
MIR2111a//MIR2111b//MIR2111c	UAAUCUGCAUCCUGAGGUUU	Scaffold 11204	UAAUCUGCAUCCUGAGGUUUA	Arabidopsis lyrata	102	20	3		5'	Sense	51.97	48.03	61.9	60.6863	1.26351	3' sub templated	1	0
MIR157d	ACAGAAGAUAGAGAGCAC	Scaffold 08935	UGACAGAAGAUAGAGAGCAC	Arabidopsis lyrata	83	18			5'	Sense	57.84	42.16	45.2	54.4578	1.29169	5' sub templated	2	0
MIR477b//MIR477e	ACUCUCCCUCAAGGGCUUCUGC	Scaffold 02226	CUCUCCCUCAAGGGCUUCUG	Manihot esculenta	105	22	1	1 (1 nt)	5'	Sense	54.29	45.71	62.4	59.4286	1.30012	5' and 3' super templated	2	0
MIR482	AGAUGGGUGGCUCGGGAAGAAG	Scaffold 03604	AGAUGGGUGGCUGGGCAAGAAG	Hevea brasiliensis	95	22		1 (1 nt)	3'	Antisense	48.43	51.57	63.9	67.2632	1.30431	polymorphic	2	2
MIR482	UCUUCCCGACACCACCCAUUCC	Scaffold 03604	UCUUCCCUACUCCACCCAUUCC	Manihot esculenta	95	22		1 (1 nt)	5'	Antisense	48.43	51.57	63.9	67.2632	1.30431	polymorphic	2	2
MIR169a//MIR169b//MIR169c//MIR169d//MIR169e//MIR169f//MIR169g//MIR169h	UAGCCAAGGAUGACUUGCCU	Scaffold 08757	UAGCCAAGGAUGACUUGCCU	Solanum tuberosum	176	20	2	1 (1nt)	3'	Antisense	72.16	27.84	64.2	36.4773	1.31025	Exact Match	0	0
MIR169g//MIR169h//MIR169i//MIR169j//MIR169k//MIR169l	UAGCCAAGGAUGACUUGCCUGC	Scaffold 08757	UAGCCAAGGAUGACUUGCCUGC	Brassica napus	176	22	2	1 (1nt)	3'	Antisense	72.16	27.84	64.2	36.4773	1.31025	Exact Match	0	0
MIR169h//MIR169i//MIR169j//MIR169k//MIR169l//MIR169m	UAGCCAAGGAUGACUUGCCUG	Scaffold 08757	UAGCCAAGGAUGACUUGCCUG	Arabidopsis lyrata	176	21	2	1 (1nt)	3'	Antisense	72.16	27.84	64.2	36.4773	1.31025	Exact Match	0	0
MIR156b	GACAGAAGAUAGAGAGCAC	Scaffold 06871	CUGACAGAAGAUAGAGAGCAC	Selaginella moellendorffii	82	19			3'	Antisense	59.76	40.24	45.7	55.7317	1.38498	5' sub templated	2	0
MIR482	GAUGGGUGGCUCGGGAAGAAG	Scaffold 03604	AGAUGGGUGGCUGGGCAAGAAG	Hevea brasiliensis	122	21		1 (1 nt)	3'	Antisense	51.64	48.36	83	68.0328	1.4068	5' sub polymorphic	3	2
MIR482	UCUUCCCGACACCACCCAUUCCA	Scaffold 03604	UCUUCCCUACUCCACCCAUUCC	Manihot esculenta	122	23		1 (1 nt)	5'	Antisense	51.64	48.36	83	68.0328	1.4068	3' super polymorphic	3	2
MIR156k//MIR156n//MIR156o	UUGACAGAAGAGAGUGAGCAC	Scaffold 03049	UUGACAGAAGAGAGUGAGCAC	Glycine max	90	21			5'	Sense	68.89	31.11	47.8	53.1111	1.7072	Exact Match	0	0

## Sheet: Sheet2
#N/A	#N/A	#N/A	#N/A
#N/A	#N/A	#N/A	#N/A
#N/A	#N/A	#N/A	#N/A
#N/A	UUGACAGAAGAGAGAGAGCAC	#N/A	#N/A
#N/A	UUGACAGAAGAUAGAGAGCAC	UUGACAGAAGAUAGAGAGCAC	UUGACAGAAGAUAGAGAGCAC
#N/A	#N/A	#N/A	#N/A
#N/A	#N/A	#N/A	#N/A
#N/A	#N/A	#N/A	#N/A
GCUCUCUAUGCUUCUGUCAUCU	#N/A	#N/A	#N/A
#N/A	#N/A	#N/A	#N/A
#N/A	UUGACAGAAGAUAGAGGGCAC	#N/A	#N/A
#N/A	#N/A	#N/A	#N/A
#N/A	#N/A	#N/A	#N/A
#N/A	#N/A	#N/A	#N/A
#N/A	#N/A	#N/A	#N/A
#N/A	#N/A	#N/A	#N/A
#N/A	UUGACAGAAGAGAGUGAGCAC	#N/A	#N/A
UGACAGAAGAGAGUGAGCACU	#N/A	#N/A	#N/A
#N/A	#N/A	#N/A	#N/A
#N/A	#N/A	#N/A	#N/A
#N/A	#N/A	#N/A	#N/A
#N/A	#N/A	#N/A	#N/A
#N/A	#N/A	#N/A	#N/A
#N/A	#N/A	#N/A	#N/A
#N/A	#N/A	#N/A	#N/A
UGCUCUCUAUGCUUCUGUCAUC	#N/A	#N/A	#N/A
#N/A	#N/A	#N/A	#N/A
#N/A	#N/A	#N/A	#N/A
#N/A	#N/A	#N/A	#N/A
#N/A	#N/A	#N/A	#N/A
UGCCUGGCUCCCUGUAUGCCA	UGCCUGGCUCCCUGUAUGCCA	UGCCUGGCUCCCUGUAUGCCA	UGCCUGGCUCCCUGUAUGCCA
UGCCUGGCUCCCUGAAUGCCA	UGCCUGGCUCCCUGAAUGCCA	#N/A	#N/A
#N/A	#N/A	#N/A	#N/A
#N/A	#N/A	UCGAUAAACCUCUGCAUCCAG	UCGAUAAACCUCUGCAUCCAG
#N/A	#N/A	#N/A	#N/A
#N/A	#N/A	#N/A	#N/A
#N/A	#N/A	#N/A	#N/A
#N/A	#N/A	#N/A	#N/A
#N/A	#N/A	#N/A	#N/A
#N/A	#N/A	UGGAGAAGCAGGGCACGUGCA	UGGAGAAGCAGGGCACGUGCA
#N/A	UGGAGAAGCAGGGCACGUGC	#N/A	#N/A
#N/A	#N/A	#N/A	#N/A
#N/A	#N/A	#N/A	#N/A
#N/A	UCGGACCAGGCUUCAUUCCCCC	#N/A	#N/A
#N/A	#N/A	#N/A	#N/A
#N/A	#N/A	#N/A	#N/A
#N/A	#N/A	#N/A	#N/A
#N/A	#N/A	#N/A	#N/A
#N/A	#N/A	#N/A	#N/A
#N/A	#N/A	#N/A	#N/A
GGAAUGUUGUCUGGCUCGAGGAC	#N/A	#N/A	#N/A
#N/A	#N/A	#N/A	#N/A
#N/A	#N/A	#N/A	#N/A
#N/A	#N/A	#N/A	#N/A
#N/A	#N/A	#N/A	#N/A
#N/A	#N/A	#N/A	#N/A
#N/A	#N/A	#N/A	#N/A
#N/A	#N/A	#N/A	#N/A
#N/A	#N/A	#N/A	#N/A
#N/A	#N/A	#N/A	#N/A
#N/A	#N/A	#N/A	#N/A
#N/A	#N/A	#N/A	#N/A
#N/A	#N/A	#N/A	#N/A
#N/A	#N/A	#N/A	#N/A
#N/A	#N/A	#N/A	#N/A
#N/A	#N/A	#N/A	#N/A
#N/A	#N/A	#N/A	#N/A
GGAAUGUUGUUUGGCUCGAGG	#N/A	#N/A	#N/A
#N/A	#N/A	#N/A	#N/A
#N/A	#N/A	UCGGACCAGGCUUCAUUCCCGU	UCGGACCAGGCUUCAUUCCCGU
#N/A	#N/A	#N/A	#N/A
#N/A	#N/A	#N/A	#N/A
#N/A	#N/A	#N/A	#N/A
UCUCGGACCAGGCUUCAUUC	#N/A	#N/A	#N/A
#N/A	#N/A	#N/A	#N/A
#N/A	#N/A	#N/A	#N/A
#N/A	#N/A	#N/A	#N/A
#N/A	#N/A	UGAAGCUGCCAGCAUGAUCUA	UGAAGCUGCCAGCAUGAUCUA
UGAAGCUGCCAGCAUGAUCUAA	#N/A	#N/A	#N/A
#N/A	#N/A	#N/A	#N/A
GGUCAUGCUCUGACAGCCUCACU	#N/A	#N/A	#N/A
#N/A	#N/A	#N/A	#N/A
#N/A	#N/A	UGAAGCUGCCAGCAUGAUCUU	UGAAGCUGCCAGCAUGAUCUU
UGAAGCUGCCAGCAUGAUCUGA	#N/A	UGAAGCUGCCAGCAUGAUCUGA	UGAAGCUGCCAGCAUGAUCUGA
#N/A	#N/A	#N/A	#N/A
#N/A	#N/A	#N/A	#N/A
#N/A	#N/A	#N/A	#N/A
#N/A	#N/A	#N/A	#N/A
#N/A	CAGCCAAGAAUGACUUGCCU	#N/A	#N/A
#N/A	#N/A	#N/A	#N/A
#N/A	#N/A	#N/A	#N/A
UAGCCAAGGAUGACUUGCCU	UAGCCAAGGAUGACUUGCCU	#N/A	#N/A
#N/A	#N/A	UGAGCCAAGGAUGACUUGCCG	UGAGCCAAGGAUGACUUGCCG
#N/A	#N/A	#N/A	#N/A
#N/A	#N/A	UAGCCAAGGAUGACUUGCCUG	UAGCCAAGGAUGACUUGCCUG
#N/A	#N/A	#N/A	#N/A
#N/A	#N/A	#N/A	#N/A
#N/A	#N/A	#N/A	#N/A
#N/A	#N/A	#N/A	#N/A
UAGCCAAGGAUGACUUGCCCG	#N/A	UAGCCAAGGAUGACUUGCCCG	UAGCCAAGGAUGACUUGCCCG
#N/A	#N/A	#N/A	#N/A
#N/A	#N/A	#N/A	#N/A
#N/A	#N/A	#N/A	#N/A
#N/A	#N/A	#N/A	#N/A
#N/A	UUGAGCCGCGUCAAUAUCUC	#N/A	#N/A
#N/A	UUGAGCCGCGUCAAUAUCUCC	#N/A	#N/A
#N/A	#N/A	#N/A	#N/A
#N/A	#N/A	#N/A	#N/A
#N/A	UUGAGCCGUGCCAAUAUCACG	UUGAGCCGUGCCAAUAUCACG	UUGAGCCGUGCCAAUAUCACG
#N/A	#N/A	#N/A	#N/A
UGAUUGAGCCGUGCCAAUAUCU	#N/A	#N/A	#N/A
#N/A	#N/A	#N/A	#N/A
#N/A	#N/A	#N/A	#N/A
#N/A	#N/A	#N/A	#N/A
UUGAGCCGCGCCAAUAUCACU	#N/A	#N/A	#N/A
#N/A	#N/A	#N/A	#N/A
#N/A	#N/A	#N/A	#N/A
#N/A	#N/A	GGAAUCUUGAUGAUGCUGCAG	GGAAUCUUGAUGAUGCUGCAG
#N/A	#N/A	#N/A	#N/A
#N/A	#N/A	#N/A	#N/A
#N/A	#N/A	#N/A	#N/A
UUCCAUCUCUUGCACACUGGA	#N/A	UUCCAUCUCUUGCACACUGGA	UUCCAUCUCUUGCACACUGGA
#N/A	#N/A	#N/A	#N/A
#N/A	#N/A	#N/A	#N/A
#N/A	#N/A	#N/A	#N/A
#N/A	#N/A	#N/A	#N/A
#N/A	#N/A	#N/A	#N/A
#N/A	#N/A	UUGGACUGAAGGGAGCUCCCU	UUGGACUGAAGGGAGCUCCCU
UUGGACUGAAGGGAGCUCCCUU	#N/A	#N/A	#N/A
#N/A	#N/A	#N/A	#N/A
#N/A	#N/A	#N/A	#N/A
#N/A	#N/A	#N/A	#N/A
#N/A	#N/A	#N/A	#N/A
#N/A	#N/A	#N/A	#N/A
#N/A	#N/A	#N/A	#N/A
#N/A	#N/A	#N/A	#N/A
#N/A	#N/A	#N/A	#N/A
#N/A	#N/A	#N/A	#N/A
#N/A	#N/A	#N/A	#N/A
#N/A	#N/A	#N/A	#N/A
#N/A	#N/A	#N/A	#N/A
#N/A	#N/A	#N/A	#N/A
#N/A	#N/A	#N/A	#N/A
#N/A	#N/A	#N/A	#N/A
#N/A	#N/A	#N/A	#N/A
#N/A	#N/A	#N/A	#N/A
#N/A	#N/A	#N/A	#N/A
#N/A	#N/A	#N/A	#N/A
#N/A	#N/A	#N/A	#N/A
#N/A	#N/A	#N/A	#N/A
#N/A	#N/A	#N/A	#N/A
AAGCUCAGGAGGGAUAGCGCC	#N/A	#N/A	#N/A
#N/A	#N/A	#N/A	#N/A
UCCAAAGGGAUCGCAUUGAUC	UCCAAAGGGAUCGCAUUGAUC	#N/A	#N/A
#N/A	#N/A	#N/A	#N/A
#N/A	#N/A	#N/A	#N/A
#N/A	#N/A	#N/A	#N/A
#N/A	UCCAAAGGGAUCGCAUUGAUCC	UCCAAAGGGAUCGCAUUGAUCC	UCCAAAGGGAUCGCAUUGAUCC
#N/A	#N/A	#N/A	#N/A
#N/A	#N/A	#N/A	#N/A
#N/A	#N/A	UCCAAAGGGAUCGCAUUGAUCU	UCCAAAGGGAUCGCAUUGAUCU
#N/A	#N/A	#N/A	#N/A
#N/A	#N/A	#N/A	#N/A
#N/A	#N/A	#N/A	#N/A
#N/A	#N/A	#N/A	#N/A
UUCCAAAGGGAUCGCAUUGAUC	#N/A	#N/A	#N/A
UUGGCAUUCUGUCCACCUCC	UUGGCAUUCUGUCCACCUCC	UUGGCAUUCUGUCCACCUCC	UUGGCAUUCUGUCCACCUCC
#N/A	#N/A	#N/A	#N/A
#N/A	#N/A	#N/A	#N/A
#N/A	#N/A	#N/A	#N/A
#N/A	#N/A	UCCCACAGCUUUCUUGAACUU	#N/A
UUCCACAGCUUUCUUGAACUU	#N/A	UUCCACAGCUUUCUUGAACUU	UUCCACAGCUUUCUUGAACUU
#N/A	#N/A	#N/A	#N/A
#N/A	#N/A	#N/A	#N/A
#N/A	#N/A	#N/A	#N/A
#N/A	#N/A	#N/A	#N/A
#N/A	#N/A	#N/A	#N/A
#N/A	#N/A	#N/A	#N/A
#N/A	#N/A	#N/A	#N/A
#N/A	#N/A	#N/A	#N/A
#N/A	#N/A	#N/A	#N/A
#N/A	#N/A	#N/A	#N/A
#N/A	#N/A	UUCCACAGCUUUCUUGAACUG	UUCCACAGCUUUCUUGAACUG
#N/A	#N/A	#N/A	#N/A
#N/A	UUCCACAGCUUUCUUGAACU	#N/A	#N/A
#N/A	#N/A	#N/A	#N/A
#N/A	#N/A	#N/A	#N/A
#N/A	#N/A	#N/A	#N/A
#N/A	#N/A	#N/A	#N/A
#N/A	#N/A	#N/A	#N/A
#N/A	#N/A	#N/A	#N/A
#N/A	#N/A	#N/A	#N/A
#N/A	#N/A	#N/A	#N/A
#N/A	#N/A	#N/A	#N/A
#N/A	#N/A	#N/A	#N/A
#N/A	#N/A	#N/A	#N/A
#N/A	#N/A	#N/A	#N/A
UCAUUGAGUGCAGCGUUGAUGA	#N/A	#N/A	#N/A
#N/A	#N/A	#N/A	#N/A
#N/A	#N/A	#N/A	#N/A
#N/A	#N/A	#N/A	#N/A
#N/A	#N/A	#N/A	#N/A
#N/A	UCAUUGAGUGCAGCGUUGAUG	#N/A	#N/A
#N/A	#N/A	#N/A	#N/A
#N/A	#N/A	#N/A	#N/A
#N/A	#N/A	#N/A	#N/A
#N/A	#N/A	#N/A	#N/A
#N/A	#N/A	#N/A	#N/A
#N/A	#N/A	#N/A	#N/A
#N/A	#N/A	#N/A	#N/A
#N/A	#N/A	#N/A	#N/A
#N/A	#N/A	#N/A	#N/A
#N/A	#N/A	#N/A	#N/A
#N/A	#N/A	#N/A	#N/A
#N/A	#N/A	#N/A	#N/A
#N/A	#N/A	CGCCAAAGGAGAGUUGCCCUU	#N/A
#N/A	#N/A	#N/A	#N/A
#N/A	#N/A	#N/A	#N/A
#N/A	#N/A	UGCCAAAGGAGAGUUGCCCUG	UGCCAAAGGAGAGUUGCCCUG
#N/A	#N/A	#N/A	#N/A
#N/A	#N/A	#N/A	UGCCAAAGGAGAAUUGCCCUG
#N/A	#N/A	#N/A	#N/A
#N/A	#N/A	#N/A	#N/A
#N/A	#N/A	#N/A	AUGCACUGCCUCUUCCCUGGC
#N/A	#N/A	#N/A	#N/A
#N/A	#N/A	#N/A	#N/A
#N/A	#N/A	#N/A	#N/A
#N/A	#N/A	#N/A	#N/A
#N/A	#N/A	#N/A	#N/A
#N/A	#N/A	#N/A	#N/A
#N/A	#N/A	#N/A	#N/A
#N/A	#N/A	#N/A	#N/A
#N/A	#N/A	#N/A	#N/A
#N/A	#N/A	#N/A	#N/A
#N/A	#N/A	#N/A	#N/A
#N/A	#N/A	#N/A	#N/A
#N/A	#N/A	#N/A	#N/A
#N/A	#N/A	#N/A	#N/A
#N/A	#N/A	#N/A	#N/A
#N/A	#N/A	#N/A	#N/A
#N/A	#N/A	#N/A	#N/A
#N/A	#N/A	#N/A	#N/A
#N/A	#N/A	#N/A	#N/A
#N/A	#N/A	#N/A	#N/A
#N/A	#N/A	#N/A	#N/A
UCUUACCUACACCGCCCAUGCCU	#N/A	#N/A	#N/A
#N/A	#N/A	#N/A	#N/A
#N/A	#N/A	#N/A	#N/A
#N/A	#N/A	#N/A	#N/A
#N/A	#N/A	#N/A	#N/A
#N/A	#N/A	#N/A	#N/A
#N/A	#N/A	#N/A	#N/A
#N/A	#N/A	#N/A	#N/A
#N/A	#N/A	#N/A	#N/A
#N/A	#N/A	#N/A	#N/A
#N/A	#N/A	#N/A	#N/A
#N/A	#N/A	#N/A	#N/A
#N/A	#N/A	#N/A	#N/A
#N/A	#N/A	#N/A	#N/A
#N/A	#N/A	#N/A	#N/A
#N/A	#N/A	#N/A	#N/A
#N/A	#N/A	#N/A	#N/A
#N/A	#N/A	#N/A	#N/A
#N/A	UGACAACGAGAGAGAGCACG	#N/A	#N/A
#N/A	#N/A	#N/A	#N/A
#N/A	#N/A	UGACAACGAGAGAGAGCACGU	UGACAACGAGAGAGAGCACGU
#N/A	#N/A	#N/A	#N/A
#N/A	#N/A	#N/A	#N/A
#N/A	#N/A	#N/A	#N/A
#N/A	#N/A	#N/A	#N/A
#N/A	#N/A	UGACAACGAGAGAGAGCACGG	UGACAACGAGAGAGAGCACGG
#N/A	#N/A	#N/A	#N/A
#N/A	#N/A	#N/A	#N/A
#N/A	#N/A	#N/A	#N/A
#N/A	#N/A	#N/A	#N/A
#N/A	#N/A	#N/A	#N/A
#N/A	#N/A	#N/A	#N/A
#N/A	#N/A	#N/A	#N/A
#N/A	#N/A	#N/A	#N/A
#N/A	#N/A	#N/A	#N/A
#N/A	#N/A	#N/A	#N/A
#N/A	#N/A	#N/A	#N/A
#N/A	#N/A	#N/A	#N/A
#N/A	#N/A	#N/A	#N/A
UUCAUUCCUCUUCCUAAAAUGG	#N/A	#N/A	#N/A
#N/A	#N/A	#N/A	#N/A
#N/A	#N/A	#N/A	#N/A
#N/A	UUAGAUGACCAUCAACAAAC	#N/A	#N/A
UUAGAUGACCAUCAACAAACA	#N/A	UUAGAUGACCAUCAACAAACA	UUAGAUGACCAUCAACAAACA
